# Supplementary material for: Modifying Cellulose Acetate Mixed-Matrix Membranes for Improved Oil–Water Separation: Comparison between Sodium and Organo-Montmorillonite as Particle Additives
Source: PubMed Central journal article supplement (PMC7911741; doi:10.3390/membranes11020080), 2021-01-22
Supplement: membranes-11-00080-s001.pdf [file membranes-11-00080-s001.pdf]

# *Membranes*

## **Electronic Supporting Information**

### **Modifying Cellulose Acetate Mixed-Matrix Membranes for Improved Oil–Water Separation: Comparison between Sodium and Organo-Montmorillonite as Particle Additives**

**Micah Belle Marie Yap Ang <sup>1,\*</sup>, Kiara Pauline O. Devanadera <sup>2</sup>, Alyssa Nicole R. Duena <sup>2</sup>, Zheng-Yen Luo <sup>1</sup>, Yu-Hsuan Chiao <sup>1,3</sup>, Jeremiah C. Millare <sup>2</sup>, Ruth R. Aquino <sup>4</sup>, Shu-Hsien Huang <sup>1,5,\*</sup> and Kueir-Ram Lee <sup>1,6,\*</sup>**

<sup>1</sup> R&D Center for Membrane Technology and Department of Chemical Engineering, Chung Yuan Christian University, Taoyuan 32023, Taiwan; mbmyang@gmail.com (M.B.M.Y.A.); zhengyenluo@hotmail.com (Z.-Y.L.)

<sup>2</sup> School of Chemical, Biological, and Materials Engineering and Sciences, Mapúa University, Manila 1002, Philippines; kpdevanadera@gmail.com (K.P.D.); alyduena@gmail.com (A.N.R.D.); jcmillare@mapua.edu.ph (J.C.M.)

<sup>3</sup> Department of Chemical Engineering, University of Arkansas, Fayetteville, AR 72701, USA; ychiao@uark.edu (Y.-H.C.)

<sup>4</sup> General Education Department, Colegio de Muntinlupa, Mayor J. Posadas Avenue, Sucat, Muntinlupa City 1770, Metro Manila, Philippines; ruthraquino@yahoo.com

<sup>5</sup> Department of Chemical and Materials Engineering, National Ilan University, Yilan 26047, Taiwan; huangsh@niu.edu.tw (S.-H.H.)

<sup>6</sup> Research Center for Circular Economy, Chung Yuan Christian University, Taoyuan 32023, Taiwan

\* Correspondence: mbmyang@gmail.com (M.B.M.Y.A.); huangsh@niu.edu.tw (S.-H.H.); krlee@cycu.edu.tw (K.-R.L.)

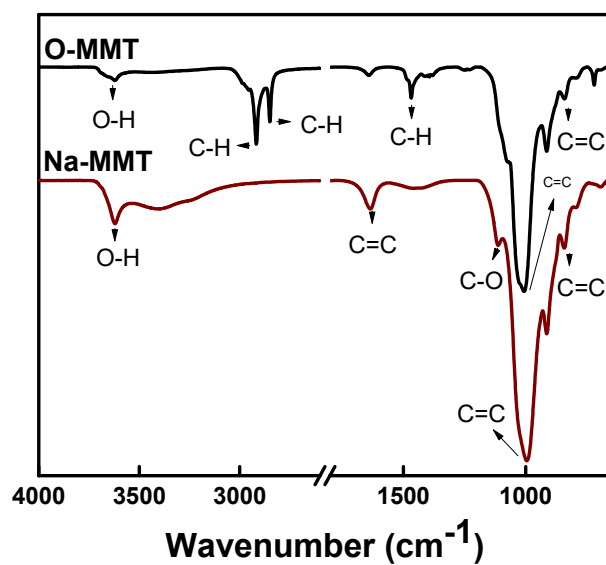

**Figure S1.** ATR-FTIR spectra of nanoclays.

Transmission electron microscopy (TEM, JEOL JEM-2100, Tokyo, Japan) was used to observe the morphology of the nanoclays. X-Ray Diffraction (XRD, Model D8 Advance Eco, Bruker, Billerica, MA, USA) determined the crystallinity of the MMTs and membranes.

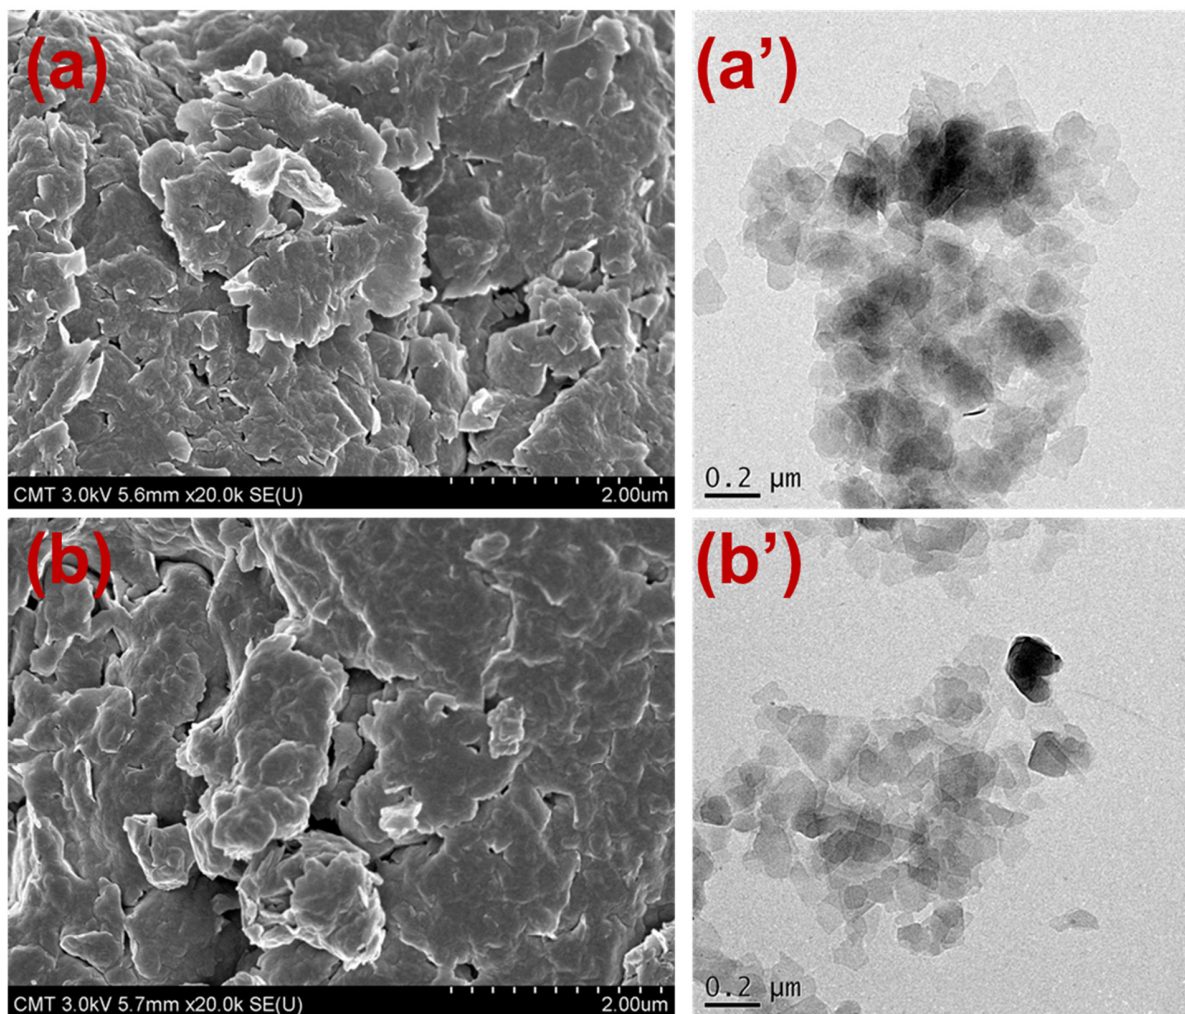

**Figure S2.** Morphology of (a,a') Na-MMT and (b,b') O-MMT.

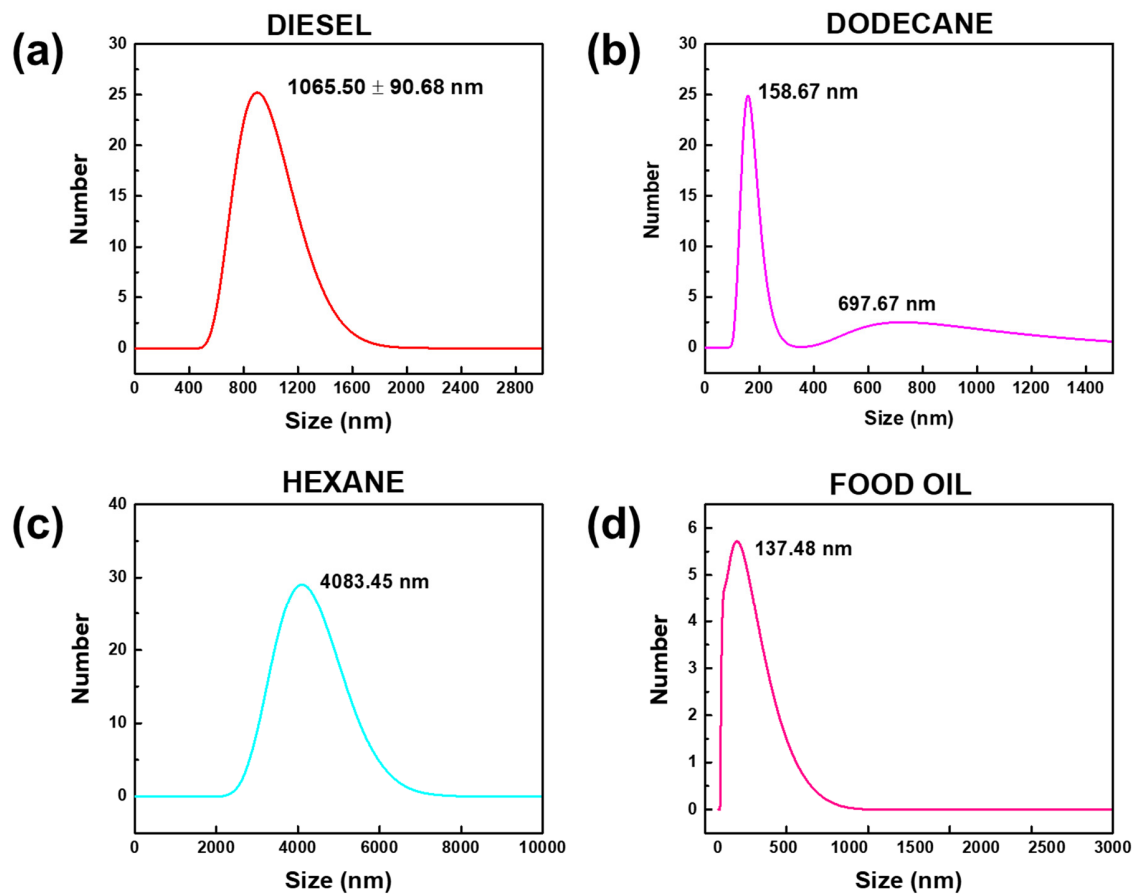

Figure S3. Droplets size of different emulsion.

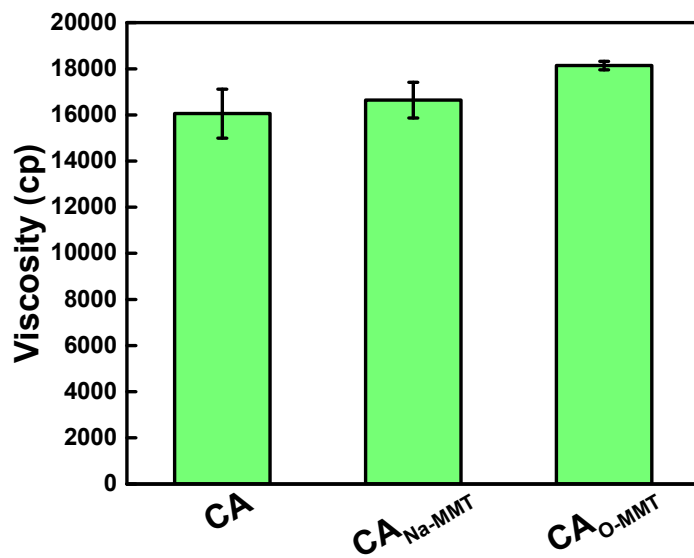

**Figure S4.** Viscosity of polymer solutions.
